# Supplementary material for: Absence of apolipoprotein E protects mice from cerebral malaria
Source: PubMed Central journal article supplement (PMC5028887; doi:10.1038/srep33615), 2016-09-20
Supplement: srep33615-s1.pdf [file srep33615-s1.pdf]

# Absence of apolipoprotein E protects mice from cerebral malaria

Fikregabrail Aberra Kassa,<sup>1,2</sup> Kristin Van Den Ham,<sup>1,2</sup>  
Anthony Rainone,<sup>1</sup> Sylvie Fournier,<sup>1</sup> Eric Boilard,<sup>3</sup> and Martin Olivier<sup>1,2,\*</sup>

<sup>1</sup>Department of Medicine, Microbiology and Immunology, Faculty of Medicine, McGill University, Montréal, Québec, Canada; <sup>2</sup>The Research Institute of the McGill University Health Centre and Infectious Diseases and Immunity in Global Health Program, Montréal, Québec, Canada; <sup>3</sup>Centre de Recherche du Centre Hospitalier Universitaire de Québec, Université Laval, Québec, Québec, Canada

\*Corresponding author:

Martin Olivier, Ph.D.  
1001 boul. Décarie  
Site Glen, Block E  
Montréal, Québec, H4A 3J1, Canada  
Email: martin.olivier@mcgill.ca

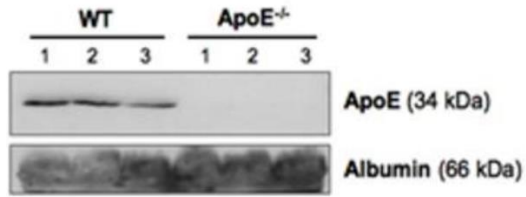

**Supplementary Figure S1. ApoE glycoprotein absent from the serum of ApoE<sup>-/-</sup> mice.**

Western blot of ApoE in WT and ApoE<sup>-/-</sup> mice. *n* = 3 from WT and ApoE<sup>-/-</sup> mice.

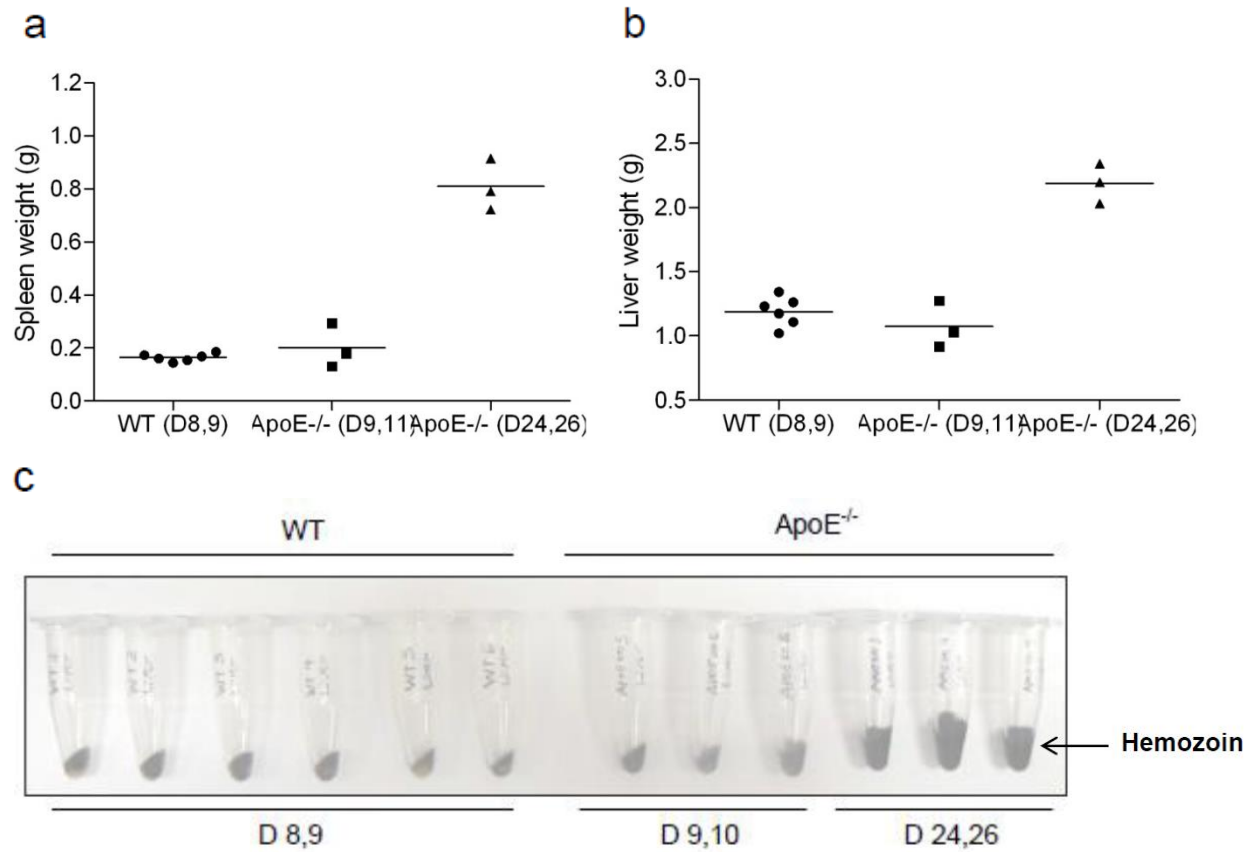

**Supplementary Figure S2. Weight of the spleen and liver, and liver deposition of hemozoin in infected mice.**

(A) Graph of spleen weight. (B) Graph of liver weight. (C) Representative figures of hemozoin accumulation in the livers of WT (day 8 and 9 post-infection) and ApoE<sup>-/-</sup> (day 9 and 10, and day 24 and 26 post-infection) mice. *n* = 6 for WT mice on day 8 and 9 post-infection, *n* = 3 for ApoE<sup>-/-</sup> mice on day 9 and 10 post-infection, and *n* = 3 for ApoE<sup>-/-</sup> mice on day 24 and 26 post-infection.

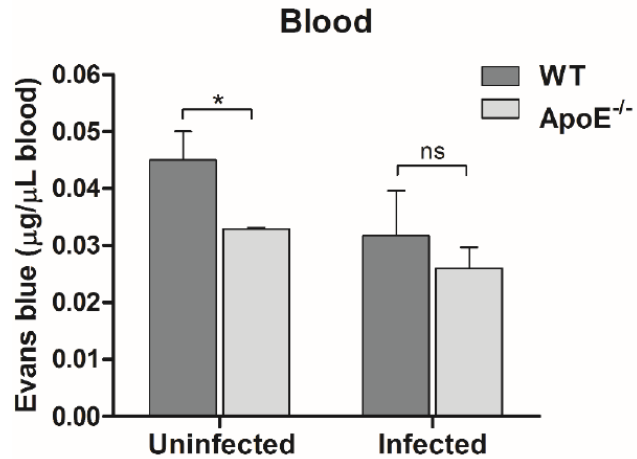

**Supplementary Figure S3. Uptake of Evans blue into the blood.** Quantification of Evans blue in the blood.  $n = 2$  for uninfected WT mice,  $n = 3$  for uninfected ApoE<sup>-/-</sup> mice,  $n = 6$  for infected WT mice, and  $n = 8$  for infected ApoE<sup>-/-</sup> mice;  $P = 0.0475$  for uninfected mice and  $P = 0.4894$  for infected mice. Infected WT mice analyzed on day 9 post-infection and infected ApoE<sup>-/-</sup> mice analyzed on day 16 post-infection, (based on their median survival times). ns  $P \geq 0.05$  and \*  $P \leq 0.05$ .

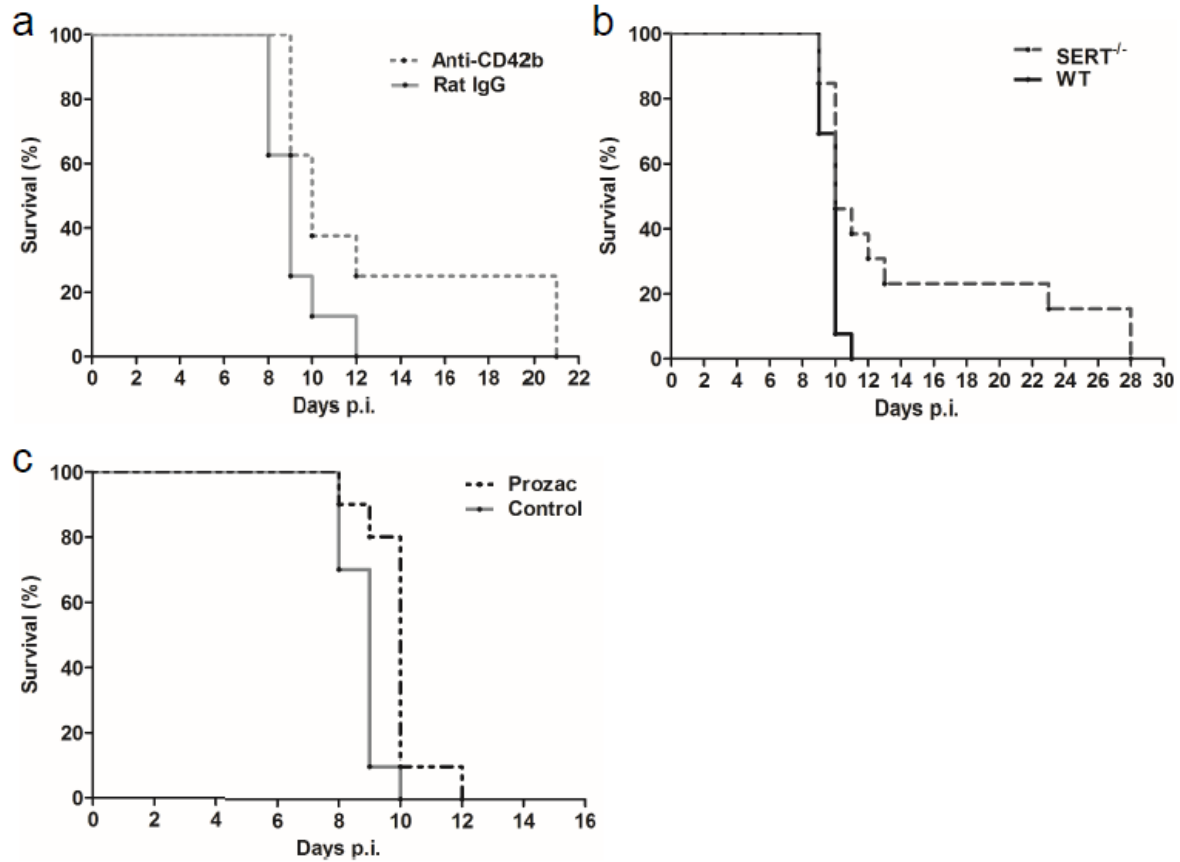

**Supplementary Figure 4. Platelet depletion, deletion of SERT and Prozac treatment**

**partially protect mice from cerebral malaria. (A)** Survival curve of control (Rat IgG) mice

and mice treated with anti-CD42b. Log-rank  $P = 0.0524$ .  $n = 8$  for the anti-CD42b-treated mice

and  $n = 8$  for the control mice. **(B)** Survival curve of WT and SERT<sup>-/-</sup> mice. Log-rank  $P =$

0.0163.  $n = 13$  for the WT mice and  $n = 13$  for the SERT<sup>-/-</sup> mice. **(C)** Survival curve of control

mice and mice treated with Prozac. Log-rank  $P = 0.0040$ .  $n = 10$  for the control mice and  $n = 10$

for the Prozac-treated mice.

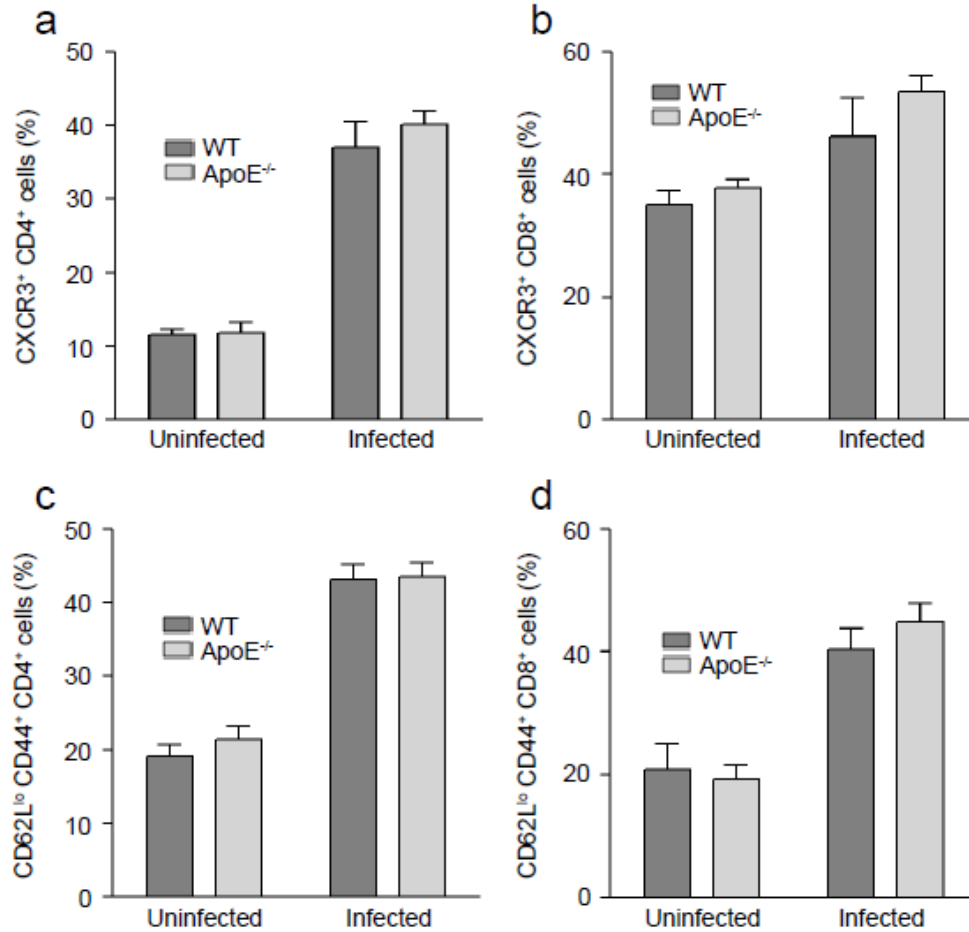

**Supplementary Figure S5. CXCR3 expression and activation of splenic CD4<sup>+</sup> and CD8<sup>+</sup> T cells is not affected by ApoE deletion.** (A) Percentage of CXCR3<sup>+</sup> cells after gating on CD4<sup>+</sup> T cells. (B) Percentage of CXCR3<sup>+</sup> cells after gating on CD8<sup>+</sup> T cells. (C) Percentage of CD62L<sup>lo</sup>CD44<sup>+</sup> cells after gating on CD4<sup>+</sup> T cells. (D) Percentage of CD62L<sup>lo</sup>CD44<sup>+</sup> cells after gating on CD8<sup>+</sup> T cells. All experiments were performed upon the onset of ECM symptoms in the infected, WT mice.  $n = 7$  for the uninfected WT and ApoE<sup>-/-</sup> mice, and  $n = 10$  for the infected, WT and ApoE<sup>-/-</sup> mice.

## SUPPLEMENTARY MATERIALS AND METHODS

### **Western blot of ApoE and albumin.**

SDS-polyacrylamide gel resolved proteins were transferred to PVDF membranes. After blocking, membranes were immunoblotted with Apo E (Millipore) and albumin (Santa Cruz Biotechnology) antibodies and appropriate secondary antibody conjugated with HRP (Sigma).

### **Quantification of hemozoin deposition.**

Equal portions of liver tissue were homogenized in PBS using a PRO200 Hand-held Homogenizer (Harvard Apparatus Canada). The tissue homogenate was sonicated for 5 min, followed by centrifugation at 13,000 rpm for 5 min. Sonication and centrifugation was repeated five times.

### **Assessment of Evans blue uptake.**

Uninfected and infected WT and ApoE<sup>-/-</sup> mice were injected intravenously with 200  $\mu$ L of 2% Evans blue dye at the onset of the neurological phase (Sigma-Aldrich). After one hour, the mice were sacrificed and the blood collected by cardiac puncture. The optical density of the dye was measured at 610 nm.

**Platelet depletion, SERT and Prozac treatment.** Platelet depletion was achieved using a monoclonal antibody directed against mouse CD42b. WT mice were injected intraperitoneally with 0.1 mg anti-CD42b antibody (Emfret Analytics) on day 4 post-infection. IgG-injected mice were used as control. For SERT experiments, mice lacking the SERT and WT mice were infected with *P. berghei* ANKA and survival was monitored as above. For Prozac treatment, WT mice were treated with Prozac, a selective serotonin re-uptake inhibitor. The contents of 20 mg Prozac pills were dissolved in 125 mL of drinking water<sup>31</sup>. Mice were treated for 3 weeks prior

to infection and the treatment continued after infection until the end of the experiment. The drinking water with Prozac was changed once a week and survival was monitored as above.

### **Flow cytometry analysis of splenic CD4<sup>+</sup> and CD8<sup>+</sup> T cells.**

Flow cytometry was performed using a BD LSR Fortessa and results were analyzed using FlowJo version 9.6.2. Splenocytes were isolated and erythrocytes were lysed in Tris-NH<sub>4</sub>Cl buffer. Cells were counted, blocked with and labelled with PerCP-Cy5.5 anti-CD4 (BD Pharmingen; RM4-5), APC-eFluor780 anti-CD8 (eBioscience; 53-6.7), APC anti-CXCR3 (BioLegend; CXCR3-173), FITC anti-CD62L (eBioscience; MEL-14), and PE-Cy7 anti-CD44 (BD Pharmingen; IM7).
